# Supplementary material for: Alterations of the WNT7A Gene in Clear Cell Renal Cell Carcinomas
Source: PLoS One. 2012 Oct 8;7(10):e47012. doi: 10.1371/journal.pone.0047012 (PMC3466251; doi:10.1371/journal.pone.0047012)
Supplement: Table S1 — Clinical-pathological characteristics and methylation, LOH, expression status of the WNT7A gene in clear cell RCC samples. (DOC) [file pone.0047012.s001.doc]

Supplementary materials section for

“**Alterations of the *WNT7A* gene in clear cell renal cell carcinomas**”

**Aleksandr G. Kondratov1§, Sergiy M. Kvasha1, Liubov A. Stoliar1, Alina M. Romanenko2, Yury M. Zgonnyk2, Vasily V. Gordiyuk1, Elena V. Kashuba4,5, Alla V. Rynditch3, Eugene R. Zabarovsky4,6,7 and Vladimir I. Kashuba1**

1. *Institute of Molecular Biology and Genetics, Department of Molecular Oncogenetics, National Academy of Science, 03680 Kyiv, Ukraine*
2. *Institute of Urology, Academy of Medical Sciences, 04053 Kyiv, Ukraine*
3. *Institute of Molecular Biology and Genetics, Department of Functional Genomics, National Academy of Science, 03680 Kyiv, Ukraine*
4. *Department of Microbiology, Tumor and Cell Biology (MTC), Karolinska Institute, Box 280, Stockholm, S-17177, Sweden*
5. *R.E. Kavetsky Institute of Experimental Pathology, Oncology and Radiobiology, National Academy of Science, Kyiv, 03022 Ukraine*
6. *Laboratory of Structural and Functional Genomics, Engelhardt Institute of Molecular Biology, RAN, 119991 Moscow*
7. *Linkoping University, Faculty of Health Sciences, Department of Clinical and Experimental Medicine, Linkoping, S-58183, Sweden*

**§**To whom correspondence should be addressed.

Email: o.g.kondratov@imbg.org.ua

This doc file includes:

Supplementary Table S1

Table S1. Clinical-pathological characteristics and methylation, LOH, expression status of the *WNT7A* gene in clear cell RCC samples.

| **№** | **TNM** | **Sex** | **Age** | **Fuhrman grade** | **DNA methylation status** | **LOH status** | **Expression level** |
| --- | --- | --- | --- | --- | --- | --- | --- |
| 1 | T3N0M0 | M | 65 | 3 | M | negative | DR |
| 2 | T2N0M0 | M | 60 | 4 | M | negative | DR |
| 3 | T3N0M0 | F | 66 | 2 | M | ND | DR |
| 4 | T3N0M0 | F | 62 | 1 | M | positive | DR |
| 5 | T2N0M0 | M | 48 | 3 | M | ND | DR |
| 6 | T3N0M0 | M | 51 | 4 | M | positive | DR |
| 7 | T2N0M0 | M | 68 | 2 | U | positive | DR |
| 8 | T3N0M0 | M | 50 | 3 | M | ND | DR |
| 9 | T2N0M0 | M | 55 | 2 | M | ND | DR |
| 10 | T3N0M0 | F | 60 | 3 | M | positive | DR |
| 11 | T3N0M0 | M | 71 | 3 | M | positive | DR |
| 12 | T3N0M0 | M | 61 | 1 | M | positive | DR |
| 13 | T2N0M0 | F | 58 | 3 | U | positive | DR |
| 14 | T1N0M0 | M | 50 | 2 | U | ND | ND |
| 15 | T2N0M0 | F | 50 | 2 | U | positive | UR |
| 16 | T1N0M0 | F | 22 | 1 | U | ND | UR |
| 17 | T3N1M0 | F | 72 | 2 | M | positive | DR |
| 18 | T2N0M0 | M | 57 | 1 | M | ND | ND |
| 19 | T1N0M0 | M | 57 | 1 | U | positive | ND |
| 20 | T2N0M0 | F | 49 | 1 | U | positive | ND |
| 21 | T3N0M0 | M | 54 | 3 | M | ND | ND |
| 22 | T3N1M0 | M | 58 | 2 | M | positive | DR |
| 23 | T2N0M0 | M | 45 | 4 | U | positive | ND |
| 24 | T2N0M0 | F | 46 | 2 | U | positive | ND |
| 25 | T2N0M0 | F | 52 | 1 | M | NI | ND |
| 26 | T2N0M0 | M | 47 | 1 | U | positive | ND |
| 27 | T2N0M0 | M | 38 | 1 | M | ND | ND |
| 28 | T2N0M0 | F | 46 | 2 | U | positive | ND |
| 29 | T2N0M0 | M | 50 | 2 | M | positive | ND |
| 30 | T2N0M0 | M | 62 | 4 | M | positive | ND |
| 31 | T2N0M0 | M | 64 | 2 | M | positive | ND |
| 32 | T2N0M0 | M | 51 | 2 | M | ND | ND |
| 33 | T2N0M0 | F | 78 | 3 | M | ND | ND |
| 34 | T2N0M0 | M | 38 | 1 | M | positive | ND |
| 35 | T2N0M0 | F | 44 | 2 | M | positive | ND |
| 36 | T2N0M0 | F | 48 | 1 | U | ND | ND |
| 37 | T3N0M2 | M | 53 | 3 | M | negative | ND |
| 38 | T2N0M0 | M | 68 | 2 | M | ND | ND |
| 39 | T2N0M0 | F | 45 | 2 | U | negative | ND |
| 40 | T2N0M0 | M | 69 | 4 | M | positive | ND |
| 41 | T2N0M0 | M | 67 | 4 | M | ND | ND |
| 42 | T2N0M0 | M | 64 | 2 | U | ND | ND |
| 43 | T2N0M0 | M | 66 | 2 | U | positive | ND |
| 44 | T2N0M0 | M | 38 | 2 | M | ND | ND |
